# Supplementary material for: Metabolic-Associated Fatty Liver Disease, Hepatitis B Surface Antigen Seroclearance, and Long-Term Risk of Hepatocellular Carcinoma in Chronic Hepatitis B
Source: MDPI journal article supplement (doi:10.3390/cancers14236012), 2022-12-06
Supplement: s1 [file s1]

# Metabolic-Associated Fatty Liver Disease, Hepatitis B Surface Antigen Seroclearance, and Long-Term Risk of Hepatocellular Carcinoma in Chronic Hepatitis B

Ming-Whei Yu, Chih-Lin Lin, Chun-Jen Liu, Wan-Jung Wu, Jui-Ting Hu, Yi-Wen Huang

## Supplementary Results

After further adjustment for antiviral treatment besides covariates in model 3 listed in Table 2, the HR of HCC associated with MAFLD was estimated to be 1.17 (95% CI: 0.47-2.96;  $p = 0.7354$ ).

We also examined whether the association between MAFLD and HCC is influenced by genetic susceptibility to fatty liver disease. Effect modification was tested by fitting an interaction term between MAFLD and the genetic polymorphism studied. In interaction analyses, PNPLA3 rs738409 C/G, TM6SF2 rs58542926 C/T, and MBOAT7 rs641738 C/T genotypes were coded 0, 1, and 2 according to the number of fatty liver disease-associated risk allele based on previous studies.[18] After adjustment for covariates in model 3 listed in Table 2, the results showed no notable interaction between MAFLD and PNPLA3 ( $p$  for interaction = 0.7398), TM6SF2 ( $p$  for interaction = 0.2333), or MBOAT7 ( $p$  for interaction = 0.3440).

We further assessed the joint association between MAFLD and genetic susceptibility by deriving a combined variable with 4 groups: non-MAFLD/low genetic susceptibility (0 risk allele), MAFLD/low genetic susceptibility, non-MAFLD/high genetic susceptibility ( $\geq 1$  risk allele), and MAFLD-high genetic susceptibility. Across all joint analyses, the combination of MAFLD and high genetic susceptibility was not observed to increase HCC risk. For example, the HRs of HCC for the combinations of MAFLD and PNPLA3 were 1.50 (95% CI = 0.48–4.71,  $p = 0.4892$ ), 1.80 (95% CI = 1.13–2.86,  $p = 0.0133$ ), and 1.49 (95% CI = 0.52–4.25,  $p = 0.4544$ ), respectively, for MAFLD/low genetic susceptibility, non-MAFLD/high genetic susceptibility, and MAFLD-high genetic susceptibility, as compared with non-MAFLD/low genetic susceptibility.

## Case-cohort study

We used data from a previous case-cohort study, involving a total of 1143 CHB patients nested in the GECC cohort, to assess the impacts of HBV genotype and viral load on the estimated effect of MAFLD on the risk of HCC.[20] In the present study, we included all of the HCC cases ( $n = 71$ ; 33 outside the subcohort) and controls ( $n = 522$ ) aged  $\geq 40$  years who were included in the cohort analysis of MAFLD and HCC.

Supplementary Table 3 shows the distributions of major viral factors at baseline in individuals with vs. without MAFLD. As can be seen, HBeAg, viral load, and HBV genotype did not significantly differ between individuals with and without MAFLD, although MAFLD patients tended to have a lower prevalence of genotype C HBV infection than patients without MAFLD (12.0% vs. 18.6%,  $p = 0.0751$ ). We then conducted weighted Cox regression to calculate HRs (95% CIs) of HCC for MAFLD and coincidental metabolic abnormalities after adjustment for HBV genotype and viral load. The results still showed no increased risk of HCC for MAFLD (HR = 0.51; 95% CI = 0.14–1.86) after further adjustment for the two major viral factors (HBV genotype C vs. non-C: HR = 4.42 [2.47–7.88]; HBV-DNA log copies/mL: HR = 1.32 [1.18–1.49]) besides coincidental metabolic abnormalities and other covariates (model 3). However, the associations with HCC for coincidental metabolic abnormalities, including diabetes (HR = 3.95, 95% CI = 1.37–11.38), obesity (HR = 3.03, 95% CI = 1.56–

5.87), and metabolic dysfunction (HR = 4.64, 95% CI = 1.72–12.50), became even stronger (Supplementary Table 4).

**Table S1.** Association between subtypes of MAFLD and incident hepatocellular carcinoma.

| Variable                                         | HCC, n | Model 1 <sup>a</sup> |        | Model 2 <sup>b</sup> |        | Model 3 <sup>c</sup> |        |
|--------------------------------------------------|--------|----------------------|--------|----------------------|--------|----------------------|--------|
|                                                  |        | HR (95% CI)          | p      | HR (95% CI)          | p      | HR (95% CI)          | p      |
| No MAFLD (n = 1121)                              | 88     | 1.0                  |        | 1.0                  |        | 1.0                  |        |
| MAFLD-obesity or metabolic dysfunction (n = 288) | 13     | 0.57 (0.32–1.01)     | 0.0545 | 1.99 (0.87–4.54)     | 0.1015 | 0.96 (0.36–2.55)     | 0.9388 |
| MAFLD-diabetes (n = 44)                          | 4      | 0.99 (0.36–2.69)     | 0.9763 | 3.58 (1.12–11.47)    | 0.0316 | 1.31 (0.29–5.98)     | 0.7239 |

Note: No HCC events occurred in 5 MAFLD-metabolic dysfunction only (non-obese, non-diabetic,  $\geq 2$  other risk abnormalities). HCC: hepatocellular carcinoma, HR: hazard ratio, CI: confidence interval. <sup>a</sup>Adjusted for age at recruitment. <sup>b</sup>Adjusted for age at recruitment, hepatic steatosis, and time-varying HBsAg seroclearance. <sup>c</sup>Adjusted for age at recruitment, hepatic steatosis, time-varying HBsAg seroclearance, tobacco and alcohol use, diabetes, obesity, metabolic dysfunction, and genetic polymorphisms of PNPLA3, TM6SF2, and MBOAT7.

**Table S2.** MAFLD and hazard ratios of all-cause and extrahepatic mortality.

| Variable                            | Events, n | Model 1 <sup>a</sup> | Model 2 <sup>b</sup> | Model 3 <sup>c</sup> |
|-------------------------------------|-----------|----------------------|----------------------|----------------------|
|                                     |           | HR (95% CI)          | HR (95% CI)          | HR (95% CI)          |
| All-cause mortality                 |           |                      |                      |                      |
| No MAFLD                            | 174       | 1.0                  | 1.0                  | 1.0                  |
| MAFLD                               | 45        | 0.84 (0.60–1.16)     | 1.41 (0.92–2.18)     | 0.81 (0.45–1.43)     |
| Extrahepatic mortality <sup>d</sup> |           |                      |                      |                      |
| No MAFLD                            | 106       | 1.0                  | 1.0                  | 1.0                  |
| MAFLD                               | 31        | 0.96 (0.64–1.43)     | 1.07 (0.66–1.74)     | 0.73 (0.34–1.55)     |

HR: hazard ratio. CI: confidence interval. <sup>a</sup>Adjusted for age at recruitment. <sup>b</sup>Adjusted for age at recruitment, hepatic steatosis, and time-varying HBsAg seroclearance. <sup>c</sup>Adjusted for age at recruitment, hepatic steatosis, time-varying HBsAg seroclearance, tobacco and alcohol use, diabetes, obesity, metabolic dysfunction, and genetic polymorphisms of PNPLA3, TM6SF2, and MBOAT7. <sup>d</sup>HRs and 95% CIs were derived from competitive risk Cox regression models, with liver-related deaths considered as a competing event.

**Table S3.** Distribution of major viral factors by MAFLD status at baseline: Case-cohort analysis (HCC: 71; controls: 522).

| Variable                            | MAFLD (n = 134) |             | No MAFLD (n = 459) |             | p <sup>a</sup> |
|-------------------------------------|-----------------|-------------|--------------------|-------------|----------------|
|                                     | n               | (%)         | n                  | (%)         |                |
| Age (years), median (IQR)           | 49.4            | (44.7–55.0) | 48.9               | (44.1–57.6) | 0.8397         |
| HBeAg positive <sup>b</sup>         | 7               | (5.3)       | 29                 | (6.5)       | 0.6035         |
| HBV DNA log copies/mL, median (IQR) | 4.14            | (3.04–5.39) | 3.99               | (3.10–5.56) | 0.7722         |
| HBV DNA $\geq 4$ log copies/mL      | 71              | (53.0)      | 229                | (49.9)      | 0.5285         |
| HBV genotype C <sup>b</sup>         | 16              | (12.0)      | 85                 | (18.6)      | 0.0751         |
| Liver enzyme <sup>b</sup>           |                 |             |                    |             |                |
| ALT $\geq 35$ U/L                   | 11              | (8.2)       | 38                 | (8.3)       | 0.9687         |
| AST $\geq 35$ U/L                   | 8               | (6.0)       | 30                 | (6.6)       | 0.8007         |

|                                              |     |        |     |        |         |
|----------------------------------------------|-----|--------|-----|--------|---------|
| Initial ultrasonography                      |     |        |     |        |         |
| Hepatic steatosis                            | 134 | (100)  | 163 | (35.5) | <0.0001 |
| Metabolic risk factors                       |     |        |     |        |         |
| Obesity                                      | 120 | (89.6) | 66  | (14.4) | <0.0001 |
| BMI $\geq 25$ kg/m <sup>2</sup> <sup>c</sup> |     |        |     |        |         |
| Diabetes                                     | 19  | (14.2) | 10  | (2.2)  | <0.0001 |
| Hypertriglyceridemia                         | 38  | (28.4) | 47  | (10.2) | <0.0001 |
| Hypercholesterolemia                         | 5   | (3.7)  | 34  | (7.4)  | 0.1657  |
| High blood pressure                          | 32  | (23.9) | 45  | (9.8)  | <0.0001 |
| <b>Follow-up</b>                             |     |        |     |        |         |
| HBsAg seroclearance                          | 37  | (27.6) | 95  | (20.7) | 0.0905  |
| HCC events                                   | 12  | (9.0)  | 59  | (12.9) | 0.2213  |

ALT: alanine aminotransferase; AST: aspartate aminotransferase; HCC: hepatocellular carcinoma; IQR: interquartile range. <sup>a</sup>Derived from  $\chi^2$  or Fisher's exact test for categorical variables, and Wilcoxon rank-sum test for continuous variables. <sup>b</sup>Data not available for all participants. Missing information in participants with MAFLD: HBeAg (n = 1) and HBV genotype (n = 1); missing information in participants without MAFLD: HBeAg (n = 13), HBV genotype (n = 3), ALT (n = 2), and AST (n = 3). <sup>c</sup>Defined according to the Asian criteria.

**Table S4.** Weighted Cox regression analysis of HCC risk associated with MAFLD after adjustment for HBV genotype and viral load: Case-cohort analysis.

| Variable                           | Model 1 <sup>a</sup> |         | Model 2 <sup>b</sup> |         | Model 3 <sup>c</sup> |         |
|------------------------------------|----------------------|---------|----------------------|---------|----------------------|---------|
|                                    | HR (95% CI)          | p       | HR (95% CI)          | p       | HR (95% CI)          | p       |
| MAFLD                              | 0.68 (0.36–1.27)     | 0.2236  | 2.22 (0.83–5.96)     | 0.1118  | 0.51 (0.14–1.86)     | 0.3048  |
| Hepatic steatosis                  | 0.37 (0.21–0.63)     | 0.0003  | 0.31 (0.13–0.72)     | 0.0062  | 0.39 (0.16–0.98)     | 0.0442  |
| HBsAg seroclearance                | 0.44 (0.22–0.89)     | 0.0231  | 0.49 (0.22–1.07)     | 0.0747  | 0.53 (0.23–1.19)     | 0.1242  |
| Diabetes                           | 1.70 (0.73–3.95)     | 0.2214  |                      |         | 3.95 (1.37–11.38)    | 0.0109  |
| Obesity                            | 1.73 (1.06–2.81)     | 0.0284  |                      |         | 3.03 (1.56–5.87)     | 0.0011  |
| Metabolic dysfunction              | 3.01 (1.16–7.83)     | 0.0239  |                      |         | 4.64 (1.72–12.50)    | 0.0024  |
| HBV DNA log copies/mL (continuous) | 1.40 (1.25–1.56)     | <0.0001 | 1.26 (1.12–1.42)     | <0.0001 | 1.32 (1.18–1.49)     | <0.0001 |
| HBV genotype C (vs. Non-C)         | 5.04 (2.97–8.55)     | <0.0001 | 4.57 (2.67–7.83)     | <0.0001 | 4.42 (2.47–7.88)     | <0.0001 |

HCC: hepatocellular carcinoma. HR: hazard ratio. CI: confidence interval. <sup>a</sup>Adjusted for age at recruitment. <sup>b</sup>Adjusted for age at recruitment and variables listed in the table. <sup>c</sup>Adjusted for age at recruitment, tobacco and alcohol use, genetic polymorphisms of PNPLA3, TM6SF2, and MBOAT7, and variables listed in the table.

**Table S5.** Baseline characteristics of subjects with and without MAFLD (Database 2006–2021, n = 1533).

| Variable                                                | MAFLD<br>(n = 444) |             | No MAFLD<br>(n = 1089) |             | p <sup>a</sup> |
|---------------------------------------------------------|--------------------|-------------|------------------------|-------------|----------------|
|                                                         | n                  | (%)         | n                      | (%)         |                |
| Age (years), median (IQR)                               | 57.0               | (52.5–63.1) | 58.2                   | (53.0–65.4) | 0.0087         |
| Cigarette smoking                                       |                    |             |                        |             | 0.0595         |
| Never                                                   | 304                | (68.5)      | 808                    | (74.3)      |                |
| Past                                                    | 40                 | (9.0)       | 73                     | (6.7)       |                |
| Current                                                 | 100                | (22.5)      | 207                    | (19.0)      |                |
| Alcohol drinking                                        | 105                | (23.7)      | 187                    | (17.2)      | 0.0034         |
| Alcohol intake $\geq 140$ g/week                        | 40                 | (9.1)       | 63                     | (5.8)       | 0.0207         |
| Ultrasonography                                         |                    |             |                        |             |                |
| Hepatic steatosis                                       | 444                | (100)       | 184                    | (16.9)      | <0.0001        |
| Liver cirrhosis                                         | 3                  | (0.7)       | 33                     | (3.0)       | 0.0045         |
| Metabolic risk factors                                  |                    |             |                        |             |                |
| BMI (kg/m <sup>2</sup> ), median (IQR)                  | 26.5               | (25.4–28.0) | 23.3                   | (21.9–24.7) | <0.0001        |
| Obesity (BMI $\geq 25$ kg/m <sup>2</sup> ) <sup>b</sup> | 373                | (84.0)      | 208                    | (19.1)      | <0.0001        |

|                                                                                                                                                               |     |        |     |        |         |
|---------------------------------------------------------------------------------------------------------------------------------------------------------------|-----|--------|-----|--------|---------|
| Central obesity (waist circumference $\geq 90$ cm)                                                                                                            | 254 | (57.2) | 148 | (13.6) | <0.0001 |
| Impaired fasting glucose                                                                                                                                      | 93  | (21.0) | 182 | (16.7) | 0.0500  |
| Diabetes                                                                                                                                                      | 116 | (26.1) | 94  | (8.6)  | <0.0001 |
| Hypertriglyceridemia                                                                                                                                          | 130 | (29.3) | 104 | (9.6)  | <0.0001 |
| High blood pressure                                                                                                                                           | 210 | (47.3) | 241 | (22.1) | <0.0001 |
| Metabolic dysfunction ( $\geq 2$ risk abnormalities, including hypertriglyceridemia, high blood pressure, and waist circumference $\geq 90$ cm <sup>b</sup> ) | 197 | (44.4) | 71  | (6.5)  | <0.0001 |
| ALT $\geq 35$ U/L                                                                                                                                             | 129 | (29.1) | 222 | (20.4) | 0.0002  |
| PNPLA3 rs738409                                                                                                                                               |     |        |     |        | 0.1316  |
| CC                                                                                                                                                            | 159 | (35.9) | 429 | (39.5) |         |
| CG                                                                                                                                                            | 208 | (47.0) | 512 | (47.1) |         |
| GG                                                                                                                                                            | 76  | (17.2) | 146 | (13.4) |         |
| TM6SF2 rs58542926                                                                                                                                             |     |        |     |        | 0.6634  |
| CC                                                                                                                                                            | 384 | (86.7) | 933 | (85.8) |         |
| CT+TT                                                                                                                                                         | 59  | (13.3) | 154 | (14.2) |         |
| MBOAT7 rs641738                                                                                                                                               |     |        |     |        | 0.1209  |
| CC                                                                                                                                                            | 234 | (52.8) | 614 | (56.5) |         |
| CT                                                                                                                                                            | 185 | (41.8) | 397 | (36.5) |         |
| TT                                                                                                                                                            | 24  | (5.4)  | 76  | (7.0)  |         |
| <b>Follow-up</b>                                                                                                                                              |     |        |     |        |         |
| HBsAg seroclearance                                                                                                                                           | 200 | (45.1) | 351 | (32.2) | <0.0001 |
| HCC events                                                                                                                                                    | 12  | (2.7)  | 52  | (4.8)  | 0.0682  |
| All-cause deaths                                                                                                                                              | 38  | (8.6)  | 98  | (9.0)  | 0.7832  |
| Liver-related                                                                                                                                                 | 5   | (1.1)  | 15  | (1.4)  | 0.8081  |
| Extrahepatic                                                                                                                                                  | 33  | (7.4)  | 83  | (7.6)  | 0.8989  |

Note: Data not available for all participants. Missing information in participants with MAFLD: amount of alcohol consumed (n = 5) and genetic polymorphisms (n = 1); missing information in participants without MAFLD: cigarette smoking (n = 1), amount of alcohol consumed (n = 7), and genetic polymorphisms (n = 2). ALT: alanine aminotransferase; HCC: hepatocellular carcinoma; IQR: interquartile range. <sup>a</sup>Derived from  $\chi^2$  or Fisher's exact test for categorical variables, and Wilcoxon rank-sum test for continuous variables. <sup>b</sup>Defined according to the Asian criteria.

**Table S6.** Adjusted hazard ratios of risk factors for incident hepatocellular carcinoma (Database 2006–2021, n = 1533).

|                                      |        | Model 1 <sup>a</sup> |        | Model 2 <sup>b</sup> |        | Model 3 <sup>c</sup> |        |
|--------------------------------------|--------|----------------------|--------|----------------------|--------|----------------------|--------|
| Variable                             | HCC, n | HR (95% CI)          | p      | HR (95% CI)          | P      | HR (95% CI)          | p      |
| MAFLD                                |        |                      |        |                      |        |                      |        |
| No (n = 1089)                        | 52     | 1.0                  |        | 1.0                  |        | 1.0                  |        |
| Yes (n = 444)                        | 12     | 0.59 (0.31–1.10)     | 0.0963 | 1.68 (0.47–5.96)     | 0.4213 | 0.73 (0.18–2.94)     | 0.6538 |
| Hepatic steatosis                    |        |                      |        |                      |        |                      |        |
| No (n = 905)                         | 49     | 1.0                  |        | 1.0                  |        | 1.0                  |        |
| Yes (n = 628)                        | 15     | 0.46 (0.25–0.81)     | 0.0080 | 0.31 (0.10–1.01)     | 0.0517 | 0.40 (0.12–1.34)     | 0.1368 |
| HBsAg seroclearance <sup>d</sup>     |        |                      |        |                      |        |                      |        |
| No (n = 982)                         | 53     | 1.0                  |        | 1.0                  |        | 1.0                  |        |
| Yes (n = 551)                        | 11     | 0.19 (0.03–1.37)     | 0.0998 | 0.20 (0.03–1.45)     | 0.1110 | 0.18 (0.03–1.33)     | 0.0936 |
| Diabetes                             |        |                      |        |                      |        |                      |        |
| No (n = 1323)                        | 51     | 1.0                  |        |                      |        | 1.0                  |        |
| Yes (n = 210)                        | 13     | 1.55 (0.84–2.86)     | 0.1660 |                      |        | 1.98 (1.03–3.78)     | 0.0395 |
| Obesity (BMI≥ 25 kg/m <sup>2</sup> ) |        |                      |        |                      |        |                      |        |
| No (n = 952)                         | 37     | 1.0                  |        |                      |        | 1.0                  |        |
| Yes (n = 581)                        | 27     | 1.33 (0.81–2.20)     | 0.2627 |                      |        | 2.03 (1.12–3.69)     | 0.0194 |

|                                    |    |                  |        |                  |        |
|------------------------------------|----|------------------|--------|------------------|--------|
| Metabolic dysfunction <sup>e</sup> |    |                  |        |                  |        |
| No (n = 1265)                      | 53 | 1.0              |        | 1.0              |        |
| Yes (n = 268)                      | 11 | 0.99 (0.51–1.89) | 0.9627 | 1.05 (0.50–2.19) | 0.9047 |
| PNPLA3                             |    |                  |        |                  |        |
| CC (n = 588)                       | 17 | 1.0              |        | 1.0              |        |
| CG (n = 720)                       | 37 | 1.83 (1.03–3.24) | 0.0401 | 1.87 (1.05–3.33) | 0.0333 |
| GG (n = 222)                       | 10 | 1.56 (0.71–3.41) | 0.2649 | 1.92 (0.87–4.22) | 0.1054 |
| TM6SF2                             |    |                  |        |                  |        |
| CC (n = 1317)                      | 55 | 1.0              |        | 1.0              |        |
| CT+TT (n = 213)                    | 9  | 0.98 (0.48–1.98) | 0.9485 | 1.08 (0.53–2.20) | 0.8410 |
| MBOAT7                             |    |                  |        |                  |        |
| CC (n = 848)                       | 39 | 1.0              |        | 1.0              |        |
| CT (n = 582)                       | 21 | 0.78 (0.46–1.33) | 0.3656 | 0.83 (0.48–1.41) | 0.4796 |
| TT (n = 100)                       | 4  | 0.88 (0.31–2.46) | 0.8044 | 0.93 (0.33–2.64) | 0.8946 |

HCC: hepatocellular carcinoma. HR: hazard ratio. CI: confidence interval. Note. 3 subjects with missing data on genetic polymorphisms. <sup>a</sup>Adjusted for age at recruitment. <sup>b</sup>Adjusted for age at recruitment and variables listed in the table. <sup>c</sup>Adjusted for age at recruitment, tobacco and alcohol use, and variables listed in the table. <sup>d</sup>HBsAg sero-clearance was treated as a time-varying covariate in the model. <sup>e</sup>≥2 risk abnormalities, including hypertriglyceridemia, high blood pressure, and waist circumference ≥90 cm.
