# Supplementary material for: Metabolic-Associated Fatty Liver Disease, Hepatitis B Surface Antigen Seroclearance, and Long-Term Risk of Hepatocellular Carcinoma in Chronic Hepatitis B
Source: MDPI journal article supplement (doi:10.3390/cancers14236012), 2022-12-06
Supplement: s1 [file s1]

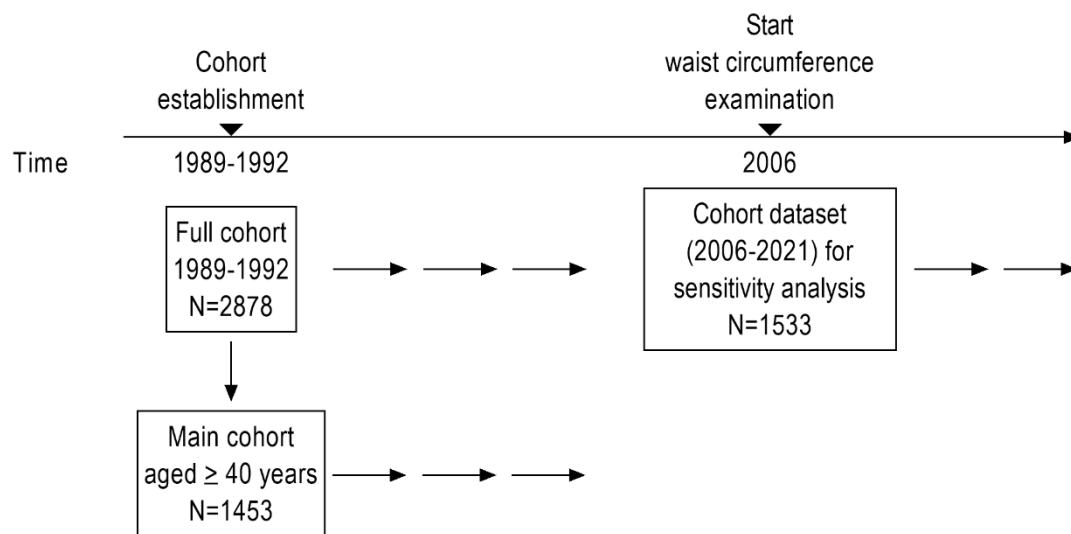

**Figure S1.** Derivation of the main cohort and the cohort dataset used for the sensitivity analysis. 767 subjects overlapped between the two cohort datasets.
